# Supplementary material for: Air Travel Is Associated with Intracontinental Spread of Dengue Virus Serotypes 1–3 in Brazil
Source: PLoS Negl Trop Dis. 2014 Apr 17;8(4):e2769. doi: 10.1371/journal.pntd.0002769 (PMC3990485; doi:10.1371/journal.pntd.0002769)
Supplement: Table S2 — List of DENV genomes used for phylogenetic and phylogeographic analyzes according to the serotype (DENV-1, DENV-2 and DENV-3), accession number, year of isolation and geographic location. (XLS) [file pntd.0002769.s003.xls]

## Sheet: Sheet1
	Supplementary table 2 - List of DENV genomes used for phylogenetic and phylogeographic
	analyzes according to the serotype (DENV-1, DENV-2 and DENV-3), acession number, year of
	isolation and gepgrphic location
	Serotype	Acession number	Year of Isolation	Location
	DENV-1	JN819405	2006	Venezuela Merida
	DENV-1	GQ199877	2007	Venezuela Merida
	DENV-1	JN819425	2004	Venezuela District Federal Caracas
	DENV-1	FJ639735	1997	Venezuela Aragua
	DENV-1	GU056029	1997	Venezuela Aragua
	DENV-1	GU056030	1997	Venezuela Aragua
	DENV-1	FJ639740	1998	Venezuela Aragua
	DENV-1	FJ639741	1998	Venezuela Aragua
	DENV-1	GU056031	1998	Venezuela Aragua
	DENV-1	GU056032	1998	Venezuela Aragua
	DENV-1	GU056033	1998	Venezuela Aragua
	DENV-1	FJ639743	1999	Venezuela Aragua
	DENV-1	GU131832	2000	Venezuela Aragua
	DENV-1	GU131833	2000	Venezuela Aragua
	DENV-1	GU131834	2001	Venezuela Aragua
	DENV-1	FJ744701	2004	Venezuela Aragua
	DENV-1	GU131835	2004	Venezuela Aragua
	DENV-1	GU131836	2004	Venezuela Aragua
	DENV-1	FJ639794	2004	Venezuela Aragua
	DENV-1	FJ639796	2004	Venezuela Aragua
	DENV-1	FJ639797	2004	Venezuela Aragua
	DENV-1	FJ639802	2004	Venezuela Aragua
	DENV-1	FJ810415	2005	Venezuela Aragua
	DENV-1	JN819410	2005	Venezuela Aragua
	DENV-1	JN819411	2005	Venezuela Aragua
	DENV-1	JN819412	2005	Venezuela Aragua
	DENV-1	GU131837	2005	Venezuela Aragua
	DENV-1	FJ639808	2005	Venezuela Aragua
	DENV-1	FJ639811	2005	Venezuela Aragua
	DENV-1	FJ639812	2005	Venezuela Aragua
	DENV-1	FJ639813	2005	Venezuela Aragua
	DENV-1	FJ639814	2005	Venezuela Aragua
	DENV-1	JN819413	2006	Venezuela Aragua
	DENV-1	JN819415	2006	Venezuela Aragua
	DENV-1	GU131838	2006	Venezuela Aragua
	DENV-1	GU131839	2006	Venezuela Aragua
	DENV-1	FJ639815	2006	Venezuela Aragua
	DENV-1	FJ639818	2006	Venezuela Aragua
	DENV-1	FJ639819	2006	Venezuela Aragua
	DENV-1	FJ639820	2006	Venezuela Aragua
	DENV-1	FJ639821	2006	Venezuela Aragua
	DENV-1	FJ639823	2006	Venezuela Aragua
	DENV-1	FJ639824	2006	Venezuela Aragua
	DENV-1	EU482609	2007	Venezuela Aragua
	DENV-1	EU482610	2007	Venezuela Aragua
	DENV-1	EU482611	2007	Venezuela Aragua
	DENV-1	FJ850099	2007	Venezuela Aragua
	DENV-1	FJ850100	2007	Venezuela Aragua
	DENV-1	FJ850101	2007	Venezuela Aragua
	DENV-1	FJ850102	2007	Venezuela Aragua
	DENV-1	FJ873809	2007	Venezuela Aragua
	DENV-1	FJ873810	2007	Venezuela Aragua
	DENV-1	JN819414	2007	Venezuela Aragua
	DENV-1	FJ882579	2007	Venezuela Aragua
	DENV-1	GU131840	2007	Venezuela Aragua
	DENV-1	GU131841	2007	Venezuela Aragua
	DENV-1	GU131842	2007	Venezuela Aragua
	DENV-1	FJ639806	2007	Venezuela Aragua
	DENV-1	FJ850103	2008	Venezuela Aragua
	DENV-1	FJ850104	2008	Venezuela Aragua
	DENV-1	HQ332177	2006	Venezuela
	DENV-1	HQ332178	2006	Venezuela
	DENV-1	HQ332180	2006	Venezuela
	DENV-1	HQ332181	2006	Venezuela
	DENV-1	HQ332182	2006	Venezuela
	DENV-1	HQ332179	2007	Venezuela
	DENV-1	HQ332183	2007	Venezuela
	DENV-1	FJ562106	1986	USA PuertoRico
	DENV-1	FJ410190	1987	USA PuertoRico
	DENV-1	FJ478458	1987	USA PuertoRico
	DENV-1	FJ410186	1992	USA PuertoRico
	DENV-1	FJ410187	1992	USA PuertoRico
	DENV-1	FJ547087	1992	USA PuertoRico
	DENV-1	FJ410183	1993	USA PuertoRico
	DENV-1	FJ410184	1993	USA PuertoRico
	DENV-1	FJ410185	1993	USA PuertoRico
	DENV-1	FJ562105	1993	USA PuertoRico
	DENV-1	FJ410175	1994	USA PuertoRico
	DENV-1	FJ410179	1994	USA PuertoRico
	DENV-1	FJ390374	1995	USA PuertoRico
	DENV-1	FJ410174	1995	USA PuertoRico
	DENV-1	FJ410180	1995	USA PuertoRico
	DENV-1	FJ410181	1995	USA PuertoRico
	DENV-1	FJ547086	1995	USA PuertoRico
	DENV-1	FJ205874	1995	USA PuertoRico
	DENV-1	FJ205875	1995	USA PuertoRico
	DENV-1	FJ410182	1996	USA PuertoRico
	DENV-1	FJ410188	1996	USA PuertoRico
	DENV-1	FJ410189	1996	USA PuertoRico
	DENV-1	FJ478457	1996	USA PuertoRico
	DENV-1	EU482567	1998	USA PuertoRico
	DENV-1	EU482592	1998	USA PuertoRico
	DENV-1	FJ390378	1998	USA PuertoRico
	DENV-1	FJ390379	1998	USA PuertoRico
	DENV-1	FJ390380	1998	USA PuertoRico
	DENV-1	FJ410173	1998	USA PuertoRico
	DENV-1	FJ205872	1998	USA PuertoRico
	DENV-1	FJ205873	1998	USA PuertoRico
	DENV-1	EU482591	2006	USA PuertoRico
	DENV-1	AY732474	1980	Thailand Bangkok
	DENV-1	AY732476	1980	Thailand Bangkok
	DENV-1	EU081258	2005	Singapore
	DENV-1	DQ285559	2004	Reunion
	DENV-1	AF514878	2000	Paraguay Lambare
	DENV-1	AF514883	2000	Paraguay Asuncion
	DENV-1	FJ562104	2006	Nicaragua Rivas
	DENV-1	EU596501	2004	Nicaragua Managua
	DENV-1	GQ199867	2004	Nicaragua Managua
	DENV-1	GQ199872	2004	Nicaragua Managua
	DENV-1	GQ199873	2004	Nicaragua Managua
	DENV-1	GQ199875	2004	Nicaragua Managua
	DENV-1	FJ898437	2004	Nicaragua Managua
	DENV-1	EU482615	2005	Nicaragua Managua
	DENV-1	EU482616	2005	Nicaragua Managua
	DENV-1	EU482617	2005	Nicaragua Managua
	DENV-1	EU482618	2005	Nicaragua Managua
	DENV-1	EU482619	2005	Nicaragua Managua
	DENV-1	FJ850113	2005	Nicaragua Managua
	DENV-1	FJ850114	2005	Nicaragua Managua
	DENV-1	FJ873814	2005	Nicaragua Managua
	DENV-1	EU596502	2005	Nicaragua Managua
	DENV-1	EU596503	2005	Nicaragua Managua
	DENV-1	EU596504	2005	Nicaragua Managua
	DENV-1	JN819402	2005	Nicaragua Managua
	DENV-1	FJ410290	2005	Nicaragua Managua
	DENV-1	FJ432720	2005	Nicaragua Managua
	DENV-1	FJ432721	2005	Nicaragua Managua
	DENV-1	FJ024423	2005	Nicaragua Managua
	DENV-1	FJ024478	2005	Nicaragua Managua
	DENV-1	FJ547089	2005	Nicaragua Managua
	DENV-1	FJ024480	2005	Nicaragua Managua
	DENV-1	FJ024481	2005	Nicaragua Managua
	DENV-1	FJ024482	2005	Nicaragua Managua
	DENV-1	FJ024483	2005	Nicaragua Managua
	DENV-1	FJ024484	2005	Nicaragua Managua
	DENV-1	FJ024485	2005	Nicaragua Managua
	DENV-1	FJ182002	2005	Nicaragua Managua
	DENV-1	JN819403	2006	Nicaragua Managua
	DENV-1	FJ547068	2006	Nicaragua Managua
	DENV-1	FJ024479	2006	Nicaragua Managua
	DENV-1	FJ898433	2007	Nicaragua Managua
	DENV-1	GQ199857	2008	Nicaragua Managua
	DENV-1	GQ199858	2008	Nicaragua Managua
	DENV-1	GQ199859	2008	Nicaragua Managua
	DENV-1	FJ547088	2008	Nicaragua Managua
	DENV-1	JF937635	2009	Nicaragua Managua
	DENV-1	JF937645	2009	Nicaragua Managua
	DENV-1	JF937644	2009	Nicaragua Managua
	DENV-1	FJ810419	2006	Nicaragua Carazo
	DENV-1	GQ868498	2006	Mexico Yucatan
	DENV-1	GU131956	2006	Mexico Yucatan
	DENV-1	GU131957	2006	Mexico Yucatan
	DENV-1	GU131958	2006	Mexico Yucatan
	DENV-1	HM631855	2007	Mexico Yucatan
	DENV-1	HQ166035	2007	Mexico Yucatan
	DENV-1	HQ166036	2007	Mexico Yucatan
	DENV-1	GQ868500	2007	Mexico Yucatan
	DENV-1	GQ868501	2007	Mexico Yucatan
	DENV-1	GQ868502	2007	Mexico Yucatan
	DENV-1	GQ868503	2007	Mexico Yucatan
	DENV-1	GQ868504	2007	Mexico Yucatan
	DENV-1	GQ868505	2007	Mexico Yucatan
	DENV-1	GQ868506	2007	Mexico Yucatan
	DENV-1	GQ868507	2007	Mexico Yucatan
	DENV-1	GQ868508	2007	Mexico Yucatan
	DENV-1	GQ868509	2007	Mexico Yucatan
	DENV-1	GQ868510	2007	Mexico Yucatan
	DENV-1	GQ868511	2007	Mexico Yucatan
	DENV-1	GQ868512	2007	Mexico Yucatan
	DENV-1	GQ868513	2007	Mexico Yucatan
	DENV-1	GQ868514	2007	Mexico Yucatan
	DENV-1	GQ868517	2007	Mexico Yucatan
	DENV-1	GQ868518	2007	Mexico Yucatan
	DENV-1	GQ868519	2007	Mexico Yucatan
	DENV-1	GQ868520	2007	Mexico Yucatan
	DENV-1	GQ868521	2007	Mexico Yucatan
	DENV-1	GQ868522	2007	Mexico Yucatan
	DENV-1	GQ868523	2007	Mexico Yucatan
	DENV-1	GQ868524	2007	Mexico Yucatan
	DENV-1	GQ868525	2007	Mexico Yucatan
	DENV-1	GQ868526	2007	Mexico Yucatan
	DENV-1	GQ868527	2007	Mexico Yucatan
	DENV-1	GQ868528	2007	Mexico Yucatan
	DENV-1	GU131960	2007	Mexico Yucatan
	DENV-1	GU131961	2007	Mexico Yucatan
	DENV-1	GU131962	2007	Mexico Yucatan
	DENV-1	GU131963	2007	Mexico Yucatan
	DENV-1	GU131964	2007	Mexico Yucatan
	DENV-1	GU131965	2007	Mexico Yucatan
	DENV-1	GU131966	2007	Mexico Yucatan
	DENV-1	GU131967	2007	Mexico Yucatan
	DENV-1	GU131968	2007	Mexico Yucatan
	DENV-1	GU131969	2007	Mexico Yucatan
	DENV-1	GU131970	2007	Mexico Yucatan
	DENV-1	GU131971	2007	Mexico Yucatan
	DENV-1	GU131972	2007	Mexico Yucatan
	DENV-1	GU131973	2007	Mexico Yucatan
	DENV-1	GU131976	2007	Mexico Yucatan
	DENV-1	GU131977	2007	Mexico Yucatan
	DENV-1	GU131978	2007	Mexico Yucatan
	DENV-1	GU131979	2007	Mexico Yucatan
	DENV-1	GU131980	2007	Mexico Yucatan
	DENV-1	GU131981	2007	Mexico Yucatan
	DENV-1	HQ166037	2008	Mexico Yucatan
	DENV-1	GQ868529	2008	Mexico Yucatan
	DENV-1	GQ868530	2008	Mexico Yucatan
	DENV-1	GQ868531	2008	Mexico Yucatan
	DENV-1	GQ868532	2008	Mexico Yucatan
	DENV-1	GQ868533	2008	Mexico Yucatan
	DENV-1	GQ868534	2008	Mexico Yucatan
	DENV-1	GQ868535	2008	Mexico Yucatan
	DENV-1	GQ868536	2008	Mexico Yucatan
	DENV-1	GQ868537	2008	Mexico Yucatan
	DENV-1	GQ868538	2008	Mexico Yucatan
	DENV-1	GQ868539	2008	Mexico Yucatan
	DENV-1	GU131983	2008	Mexico Yucatan
	DENV-1	GU131984	2008	Mexico Yucatan
	DENV-1	GQ868499	2006	Mexico QuintanaRoo
	DENV-1	GU131982	2008	Mexico
	DENV-1	EF457905	1972	Malaysia
	DENV-1	EF122231	1989	French Guiana
	DENV-1	EF122232	1989	French Guiana
	DENV-1	JN819417	1993	ElSalvador
	DENV-1	GQ868559	1998	Colombia Santander
	DENV-1	GQ868560	1998	Colombia Santander
	DENV-1	GQ868561	1999	Colombia Santander
	DENV-1	GU131948	2001	Colombia Santander
	DENV-1	GQ868562	2005	Colombia Santander
	DENV-1	GQ868566	2007	Colombia Santander
	DENV-1	GQ868567	2007	Colombia Santander
	DENV-1	GQ868568	2007	Colombia Santander
	DENV-1	GQ868569	2007	Colombia Santander
	DENV-1	GQ868570	2008	Colombia Santander
	DENV-1	GQ868563	2006	Colombia NortedeSantander
	DENV-1	GQ868564	2006	Colombia NortedeSantander
	DENV-1	GQ868565	2006	Colombia NortedeSantander
	DENV-1	GU131949	2006	Colombia NortedeSantander
	DENV-1	EU179860	2005	Brunei
	DENV-1	GQ868601	1985	BritishVirginIslands Tortola
	DENV-1	D1 S57	2002	Brazil Tocantins
	DENV-1	GU131863	2008	Brazil SaoPaulo
	DENV-1	D1 s69	2000	Brazil Roraima
	DENV-1	D1 s51	2001	Brazil Roraima
	DENV-1	D1 s63	2007	Brazil Roraima
	DENV-1	D1 S67	2008	Brazil Roraima
	DENV-1	AF226685	1990	Brazil Rio de Janeiro
	DENV-1	D1 s52	2002	Brazil Piaui
	DENV-1	D1 s55	2002	Brazil Piaui
	DENV-1	AF311956	1997	Brazil Pernambuco
	DENV-1	AF311957	1997	Brazil Pernambuco
	DENV-1	AF311958	1997	Brazil Pernambuco
	DENV-1	AF513110	2001	Brazil Parana
	DENV-1	D1 s43	1997	Brazil Para
	DENV-1	D1 s68	2000	Brazil Para
	DENV-1	D1 S59	2004	Brazil Para
	DENV-1	D1 s61	2006	Brazil Para
	DENV-1	D1 s65	2007	Brazil Para
	DENV-1	D1 S66	2007	Brazil Para
	DENV-1	FJ850070	2000	Brazil Northern
	DENV-1	FJ850071	2000	Brazil Northern
	DENV-1	FJ850075	2002	Brazil Northern
	DENV-1	FJ850077	2003	Brazil Northern
	DENV-1	FJ850081	2004	Brazil Northern
	DENV-1	FJ850084	2005	Brazil Northern
	DENV-1	FJ850087	2006	Brazil Northern
	DENV-1	FJ850090	2007	Brazil Northern
	DENV-1	FJ850093	2008	Brazil Northern
	DENV-1	FJ850073	2001	Brazil Northeast
	DENV-1	D1 s56	2002	Brazil Mato Grosso
	DENV-1	D1 s72	2008	Brazil Mato Grosso
	DENV-1	D1 s71	2000	Brazil Maranhao
	DENV-1	D1 S58	2003	Brazil Maranhao
	DENV-1	D1 s73	2008	Brazil Espirito Santo
	DENV-1	D1 s40	1994	Brazil Ceara
	DENV-1	D1 S47	2000	Brazil Ceara
	DENV-1	AB519681	2001	Brazil Brasilia
	DENV-1	D1 s62	2007	Brazil Amazonas
	DENV-1	D1 s49	2001	Brazil Amapa
	DENV-1	D1 s60	2005	Brazil Amapa
	DENV-1	D1 s48	2000	Brazil Acre
	DENV-1	FJ384655	2000	Brazil
	DENV-1	AF514889	2000	Argentina Wanda Misiones
	DENV-1	AF514876	2000	Argentina San Pedro Jujuy
	DENV-1	AF514885	2000	Argentina Libertad Misiones
	DENV-1	AY206457	2000	Argentina Eldorado Misiones
	DENV-1	AY277664	2000	Argentina Buenos Aires
	DENV-1	AY277665	2000	Argentina Buenos Aires
	DENV-1	AY277666	2000	Argentina Buenos Aires
	DENV-2	H629766	2000	Brazil Acre
	DENV-2	H676618	2004	Brazil Acre
	DENV-2	H660059	2002	Brazil Amapa
	DENV-2	H710008	2006	Brazil Amapa
	DENV-2	H726377	2007	Brazil Amapa
	DENV-2	H730923	2007	Brazil Amazonas
	DENV-2	H527821D2	1994	Brazil Ceara
	DENV-2	H527541	1994	Brazil Ceara
	DENV-2	H517822	1994	Brazil Ceara
	DENV-2	H642152	2001	Brazil Ceara
	DENV-2	H652413	2002	Brazil Espirito santo
	DENV-2	H645487	2001	Brazil Maranhao
	DENV-2	H723495D2	2007	Brazil Maranhao
	DENV-2	H723494	2007	Brazil Maranhao
	DENV-2	H654413	2002	Brazil Mato grosso do sul
	DENV-2	H533198	1995	Brazil Minas gerais
	DENV-2	FJ850072	2000	Brazil Northern
	DENV-2	FJ850074	2001	Brazil Northern
	DENV-2	FJ850076	2002	Brazil Northern
	DENV-2	GQ868640	2003	Brazil Northern
	DENV-2	FJ850078	2003	Brazil Northern
	DENV-2	FJ850082	2004	Brazil Northern
	DENV-2	FJ850085	2005	Brazil Northern
	DENV-2	FJ850088	2006	Brazil Northern
	DENV-2	FJ850091	2007	Brazil Northern
	DENV-2	GQ199890	2008	Brazil Northern
	DENV-2	H618438	1999	Brazil Para
	DENV-2	H628243	2000	Brazil Para
	DENV-2	H623360	2001	Brazil Para
	DENV-2	H666995	2003	Brazil Para
	DENV-2	H674704	2004	Brazil Para
	DENV-2	H688004	2005	Brazil Para
	DENV-2	H655259	2002	Brazil Piaui
	DENV-2	H506347D2	1991	Brazil Rio grande do norte
	DENV-2	H617724	1999	Brazil Rio grande do norte
	DENV-2	H745039	2008	Brazil Rio grande do norte
	DENV-2	H710686	2006	Brazil Rondonia
	DENV-2	H547176	1996	Brazil Roraima
	DENV-2	H547177	1996	Brazil Roraima
	DENV-2	H626903	2000	Brazil Roraima
	DENV-2	GU131864	2008	Brazil SaoPaulo
	DENV-2	GU131879	2008	Brazil SaoPaulo
	DENV-2	GU131880	2008	Brazil SaoPaulo
	DENV-2	GU131881	2008	Brazil SaoPaulo
	DENV-2	GU131882	2008	Brazil SaoPaulo
	DENV-2	GU131883	2008	Brazil SaoPaulo
	DENV-2	GU131884	2008	Brazil SaoPaulo
	DENV-2	GU131885	2008	Brazil SaoPaulo
	DENV-2	GQ868549	2008	Brazil SaoPaulo
	DENV-2	GQ868550	2008	Brazil SaoPaulo
	DENV-2	GQ868551	2008	Brazil SaoPaulo
	DENV-2	H508744	1991	Brazil Tocantins
	DENV-2	H709119	2006	Brazil Tocantins
	DENV-2	H739202	2008	Brazil Tocantins
	DENV-2	FJ639702	2003	Cambodia BTB
	DENV-2	FJ639703	2003	Cambodia BTB
	DENV-2	FJ639697	2001	Cambodia KCH
	DENV-2	FJ639701	2002	Cambodia KCH
	DENV-2	FJ639698	2002	Cambodia KCH
	DENV-2	FJ639699	2002	Cambodia KCH
	DENV-2	FJ024477	2004	Colombia Antioquia
	DENV-2	FJ182012	2005	Colombia Guaviare
	DENV-2	EU854294	2005	Colombia Guaviare
	DENV-2	FJ024473	2005	Colombia Guaviare
	DENV-2	FJ024474	2005	Colombia Guaviare
	DENV-2	FJ024475	2005	Colombia Guaviare
	DENV-2	GQ868555	2005	Colombia NortedeSantander
	DENV-2	GQ868556	2005	Colombia NortedeSantander
	DENV-2	GQ868557	2005	Colombia NortedeSantander
	DENV-2	GQ868552	1998	Colombia Santander
	DENV-2	GQ868553	1999	Colombia Santander
	DENV-2	GQ868554	2004	Colombia Santander
	DENV-2	GQ868558	2007	Colombia Santander
	DENV-2	GU131947	2007	Colombia Santander
	DENV-2	FJ898451	2003	DominicanRepublic
	DENV-2	GQ199892	2007	Jamaica
	DENV-2	FJ898439	2008	Mexico Chiapas
	DENV-2	GQ199894	2005	Mexico Hidalgo
	DENV-2	FJ898438	2002	Mexico Nayarit
	DENV-2	GQ199893	2002	Mexico Oaxaca
	DENV-2	GU131955	2004	Mexico QuintanaRoo
	DENV-2	GQ868497	2006	Mexico Yucatan
	DENV-2	GU131959	2006	Mexico Yucatan
	DENV-2	GQ868515	2007	Mexico Yucatan
	DENV-2	GQ868516	2007	Mexico Yucatan
	DENV-2	GU131974	2007	Mexico Yucatan
	DENV-2	GU131975	2007	Mexico Yucatan
	DENV-2	FJ850067	2006	Nicaragua Carazo
	DENV-2	GQ199896	2006	Nicaragua Carazo
	DENV-2	FJ744741	2006	Nicaragua Carazo
	DENV-2	FJ744742	2006	Nicaragua Carazo
	DENV-2	FJ850060	2000	Nicaragua Leon
	DENV-2	FJ850061	2000	Nicaragua Leon
	DENV-2	FJ850062	2000	Nicaragua Leon
	DENV-2	FJ850063	2000	Nicaragua Leon
	DENV-2	FJ850064	2000	Nicaragua Leon
	DENV-2	FJ850065	2000	Nicaragua Leon
	DENV-2	FJ850066	2000	Nicaragua Leon
	DENV-2	FJ873808	2000	Nicaragua Leon
	DENV-2	FJ898477	2000	Nicaragua Leon
	DENV-2	FJ898478	2000	Nicaragua Leon
	DENV-2	FJ744705	2000	Nicaragua Leon
	DENV-2	FJ744704	2001	Nicaragua Leon
	DENV-2	FJ850117	2000	Nicaragua Managua
	DENV-2	FJ744744	2000	Nicaragua Managua
	DENV-2	FJ898436	2004	Nicaragua Managua
	DENV-2	EU482695	2005	Nicaragua Managua
	DENV-2	FJ850115	2005	Nicaragua Managua
	DENV-2	EU482597	2005	Nicaragua Managua
	DENV-2	FJ898435	2005	Nicaragua Managua
	DENV-2	EU482598	2005	Nicaragua Managua
	DENV-2	EU482599	2005	Nicaragua Managua
	DENV-2	EU482752	2005	Nicaragua Managua
	DENV-2	EU482757	2005	Nicaragua Managua
	DENV-2	EU482758	2005	Nicaragua Managua
	DENV-2	EU482759	2005	Nicaragua Managua
	DENV-2	EU482761	2005	Nicaragua Managua
	DENV-2	FJ906962	2005	Nicaragua Managua
	DENV-2	EU482636	2005	Nicaragua Managua
	DENV-2	EU482637	2005	Nicaragua Managua
	DENV-2	EU482680	2005	Nicaragua Managua
	DENV-2	GQ868604	2005	Nicaragua Managua
	DENV-2	EU482681	2005	Nicaragua Managua
	DENV-2	EU596484	2005	Nicaragua Managua
	DENV-2	EU482686	2006	Nicaragua Managua
	DENV-2	EU482687	2006	Nicaragua Managua
	DENV-2	EU482688	2006	Nicaragua Managua
	DENV-2	EU482689	2006	Nicaragua Managua
	DENV-2	EU482620	2006	Nicaragua Managua
	DENV-2	EU482639	2006	Nicaragua Managua
	DENV-2	EU482444	2006	Nicaragua Managua
	DENV-2	EU482682	2006	Nicaragua Managua
	DENV-2	EU482683	2006	Nicaragua Managua
	DENV-2	EU596483	2006	Nicaragua Managua
	DENV-2	EU482684	2006	Nicaragua Managua
	DENV-2	EU482685	2006	Nicaragua Managua
	DENV-2	FJ744708	2007	Nicaragua Managua
	DENV-2	EU482694	2007	Nicaragua Managua
	DENV-2	EU596497	2007	Nicaragua Managua
	DENV-2	EU596498	2007	Nicaragua Managua
	DENV-2	FJ373301	2007	Nicaragua Managua
	DENV-2	EU660404	2007	Nicaragua Managua
	DENV-2	FJ850116	2007	Nicaragua Managua
	DENV-2	EU660405	2007	Nicaragua Managua
	DENV-2	FJ898432	2007	Nicaragua Managua
	DENV-2	FJ898434	2007	Nicaragua Managua
	DENV-2	EU482601	2007	Nicaragua Managua
	DENV-2	FJ639834	2007	Nicaragua Managua
	DENV-2	EU482621	2007	Nicaragua Managua
	DENV-2	FJ639835	2007	Nicaragua Managua
	DENV-2	FJ639836	2007	Nicaragua Managua
	DENV-2	EU482623	2007	Nicaragua Managua
	DENV-2	EU482624	2007	Nicaragua Managua
	DENV-2	FJ906960	2007	Nicaragua Managua
	DENV-2	FJ898479	2007	Nicaragua Managua
	DENV-2	EU482638	2007	Nicaragua Managua
	DENV-2	FJ882593	2007	Nicaragua Managua
	DENV-2	FJ882594	2007	Nicaragua Managua
	DENV-2	GQ199866	2007	Nicaragua Managua
	DENV-2	EU569702	2007	Nicaragua Managua
	DENV-2	FJ744743	2007	Nicaragua Managua
	DENV-2	FJ744706	2007	Nicaragua Managua
	DENV-2	FJ744707	2007	Nicaragua Managua
	DENV-2	FJ744709	2008	Nicaragua Managua
	DENV-2	FJ810418	2008	Nicaragua Managua
	DENV-2	FJ744745	2000	Nicaragua Masaya
	DENV-2	GQ199897	2002	Nicaragua Matagalpa
	DENV-2	EU482568	1986	PuertoRico
	DENV-2	EU569704	1986	PuertoRico
	DENV-2	EU482571	1987	PuertoRico
	DENV-2	EU482575	1987	PuertoRico
	DENV-2	EU482576	1987	PuertoRico
	DENV-2	EU482577	1987	PuertoRico
	DENV-2	EU482578	1988	PuertoRico
	DENV-2	EU660398	1989	PuertoRico
	DENV-2	EU482562	1989	PuertoRico
	DENV-2	EU482580	1989	PuertoRico
	DENV-2	EU482581	1989	PuertoRico
	DENV-2	EU482743	1989	PuertoRico
	DENV-2	EU482587	1990	PuertoRico
	DENV-2	EU482588	1990	PuertoRico
	DENV-2	GQ398269	1994	PuertoRico
	DENV-2	GQ398270	1994	PuertoRico
	DENV-2	GQ398271	1994	PuertoRico
	DENV-2	GQ398272	1994	PuertoRico
	DENV-2	GQ398273	1994	PuertoRico
	DENV-2	GQ398296	1994	PuertoRico
	DENV-2	GQ398297	1994	PuertoRico
	DENV-2	GQ398299	1994	PuertoRico
	DENV-2	GQ398302	1994	PuertoRico
	DENV-2	GQ398303	1994	PuertoRico
	DENV-2	GQ398305	1994	PuertoRico
	DENV-2	GQ398306	1994	PuertoRico
	DENV-2	GQ398311	1994	PuertoRico
	DENV-2	EU482736	1994	PuertoRico
	DENV-2	EU482739	1994	PuertoRico
	DENV-2	EU482740	1994	PuertoRico
	DENV-2	EU529694	1994	PuertoRico
	DENV-2	GQ398298	1995	PuertoRico
	DENV-2	GQ398301	1995	PuertoRico
	DENV-2	EU660399	1995	PuertoRico
	DENV-2	EU569706	1995	PuertoRico
	DENV-2	EU569707	1995	PuertoRico
	DENV-2	EU569708	1995	PuertoRico
	DENV-2	EU482561	1996	PuertoRico
	DENV-2	EU677141	1996	PuertoRico
	DENV-2	EU569703	1996	PuertoRico
	DENV-2	EU596485	1996	PuertoRico
	DENV-2	EU569717	1997	PuertoRico
	DENV-2	EU569718	1997	PuertoRico
	DENV-2	EU569719	1997	PuertoRico
	DENV-2	EU569720	1997	PuertoRico
	DENV-2	EU482550	1998	PuertoRico
	DENV-2	EU660400	1998	PuertoRico
	DENV-2	EU482560	1998	PuertoRico
	DENV-2	EU482565	1998	PuertoRico
	DENV-2	EU482727	1998	PuertoRico
	DENV-2	EU482732	1998	PuertoRico
	DENV-2	EU687212	1998	PuertoRico
	DENV-2	EU482738	1998	PuertoRico
	DENV-2	EU482547	1998	PuertoRico
	DENV-2	EU482557	1999	PuertoRico
	DENV-2	EU677142	1999	PuertoRico
	DENV-2	EU677143	1999	PuertoRico
	DENV-2	EU677144	1999	PuertoRico
	DENV-2	EU482730	1999	PuertoRico
	DENV-2	EU677145	1999	PuertoRico
	DENV-2	EU687235	2003	PuertoRico
	DENV-2	EU687237	2003	PuertoRico
	DENV-2	EU687240	2003	PuertoRico
	DENV-2	EU687213	2004	PuertoRico
	DENV-2	EU687214	2004	PuertoRico
	DENV-2	EU687215	2004	PuertoRico
	DENV-2	EU687242	2004	PuertoRico
	DENV-2	EU482556	2005	PuertoRico
	DENV-2	EU482731	2005	PuertoRico
	DENV-2	EU687217	2005	PuertoRico
	DENV-2	EU482551	2006	PuertoRico
	DENV-2	EU482552	2006	PuertoRico
	DENV-2	EU482719	2006	PuertoRico
	DENV-2	EU482720	2006	PuertoRico
	DENV-2	EU482721	2006	PuertoRico
	DENV-2	EU482548	2006	PuertoRico
	DENV-2	EU482549	2006	PuertoRico
	DENV-2	EU596488	2007	PuertoRico
	DENV-2	EU596490	2007	PuertoRico
	DENV-2	EU596491	2007	PuertoRico
	DENV-2	EU081178	2005	Singapore
	DENV-2	GQ868591	1964	Thailand
	DENV-2	DQ181806	1974	Thailand Bangkok
	DENV-2	DQ181805	1979	Thailand Bangkok
	DENV-2	DQ181805	1979	Thailand Bangkok
	DENV-2	DQ181804	1984	Thailand Bangkok
	DENV-2	DQ181801	1990	Thailand Bangkok
	DENV-2	GQ868595	1991	Venezuela
	DENV-2	GQ868596	1991	Venezuela
	DENV-2	GQ868597	1991	Venezuela
	DENV-2	GQ868598	1991	Venezuela
	DENV-2	GQ868541	1991	Venezuela Aragua
	DENV-2	EU687220	1996	Venezuela Aragua
	DENV-2	EU726775	1996	Venezuela Aragua
	DENV-2	FJ898465	1998	Venezuela Aragua
	DENV-2	FJ898466	2000	Venezuela Aragua
	DENV-2	FJ639734	2003	Venezuela Aragua
	DENV-2	FJ639783	2003	Venezuela Aragua
	DENV-2	FJ639788	2004	Venezuela Aragua
	DENV-2	FJ639732	2005	Venezuela Aragua
	DENV-2	FJ639733	2005	Venezuela Aragua
	DENV-2	FJ639809	2005	Venezuela Aragua
	DENV-2	FJ898467	2005	Venezuela Aragua
	DENV-2	FJ639822	2006	Venezuela Aragua
	DENV-2	GQ868641	2007	Venezuela Aragua
	DENV-2	FJ850105	2007	Venezuela Aragua
	DENV-2	EU482604	2007	Venezuela Aragua
	DENV-2	EU482605	2007	Venezuela Aragua
	DENV-2	EU482606	2007	Venezuela Aragua
	DENV-2	EU482607	2007	Venezuela Aragua
	DENV-2	EU482608	2007	Venezuela Aragua
	DENV-2	FJ850106	2008	Venezuela Aragua
	DENV-2	FJ850107	2008	Venezuela Aragua
	DENV-2	FJ850108	2008	Venezuela Aragua
	DENV-2	FJ850112	2004	Venezuela DistrictFederalCaracas
	DENV-2	GQ868540	1990	Venezuela Maracay
	DENV-2	AB479041	2002	VietNam HoChiMinh
	DENV-2	AB479042	2002	VietNam HoChiMinh
	DENV-2	FM210217	1999	VietNam South
	DENV-2	FM210224	2001	VietNam South
	DENV-2	FM210227	2002	VietNam South
	DENV-2	FM210218	2002	VietNam South
	DENV-2	EU482775	2004	VietNam south
	DENV-2	EU726776	2007	VietNam South
	DENV-2	GQ868603	1987	VirginIslands SaintJohn
	DENV-2	FJ898450	1990	VirginIslands U S VirginIslands
	DENV-2	FJ898453	2005	VirginIslands U S VirginIslands
	DENV-3	H696789	2005	AC Brazil SouthAmerica
	DENV-3	H735102	2007	AC Brazil SouthAmerica
	DENV-3	H702980	2006	AM Brazil SouthAmerica
	DENV-3	H675971	2004	Amazonas Brazil SouthAmerica
	DENV-3	H740416	2008	Amazonas Brazil SouthAmerica
	DENV-3	FJ898462	2001	Anguilla Caribbean
	DENV-3	AY496871	2002	Bangladesh Southasia
	DENV-3	AY496873	2002	Bangladesh Southasia
	DENV-3	AY496874	2002	Bangladesh Southasia
	DENV-3	AY496877	2002	Bangladesh Southasia
	DENV-3	H659202	2002	Belem Brazil SouthAmerica
	DENV-3	H675948	2004	Belem Brazil SouthAmerica
	DENV-3	H687202	2005	Belem Brazil SouthAmerica
	DENV-3	H692262	2005	Belem Brazil SouthAmerica
	DENV-3	H706777	2006	Belem Brazil SouthAmerica
	DENV-3	H721198	2007	Belem Brazil SouthAmerica
	DENV-3	FJ913015	2001	Brazil Centralwest SouthAmerica
	DENV-3	FJ850079	2003	Brazil Northern SouthAmerica
	DENV-3	FJ850080	2003	Brazil Northern SouthAmerica
	DENV-3	FJ850083	2004	Brazil Northern SouthAmerica
	DENV-3	FJ850086	2005	Brazil Northern SouthAmerica
	DENV-3	FJ850089	2006	Brazil Northern SouthAmerica
	DENV-3	FJ850092	2007	Brazil Northern SouthAmerica
	DENV-3	FJ850094	2008	Brazil Northern SouthAmerica
	DENV-3	GQ868546	2006	Brazil SaoPaulo SouthAmerica
	DENV-3	GQ868547	2006	Brazil SaoPaulo SouthAmerica
	DENV-3	GQ868548	2006	Brazil SaoPaulo SouthAmerica
	DENV-3	GU131844	2006	Brazil SaoPaulo SouthAmerica
	DENV-3	GU131845	2006	Brazil SaoPaulo SouthAmerica
	DENV-3	GU131846	2006	Brazil SaoPaulo SouthAmerica
	DENV-3	GU131847	2006	Brazil SaoPaulo SouthAmerica
	DENV-3	GU131848	2006	Brazil SaoPaulo SouthAmerica
	DENV-3	GU131849	2006	Brazil SaoPaulo SouthAmerica
	DENV-3	GU131850	2006	Brazil SaoPaulo SouthAmerica
	DENV-3	GU131851	2006	Brazil SaoPaulo SouthAmerica
	DENV-3	GU131852	2006	Brazil SaoPaulo SouthAmerica
	DENV-3	GU131853	2006	Brazil SaoPaulo SouthAmerica
	DENV-3	GU131854	2006	Brazil SaoPaulo SouthAmerica
	DENV-3	GU131855	2006	Brazil SaoPaulo SouthAmerica
	DENV-3	GU131856	2006	Brazil SaoPaulo SouthAmerica
	DENV-3	GU131857	2006	Brazil SaoPaulo SouthAmerica
	DENV-3	GU131858	2006	Brazil SaoPaulo SouthAmerica
	DENV-3	GU131859	2006	Brazil SaoPaulo SouthAmerica
	DENV-3	GU131860	2006	Brazil SaoPaulo SouthAmerica
	DENV-3	GU131865	2006	Brazil SaoPaulo SouthAmerica
	DENV-3	GU131861	2007	Brazil SaoPaulo SouthAmerica
	DENV-3	GU131862	2007	Brazil SaoPaulo SouthAmerica
	DENV-3	GU131866	2007	Brazil SaoPaulo SouthAmerica
	DENV-3	GU131867	2007	Brazil SaoPaulo SouthAmerica
	DENV-3	GU131868	2007	Brazil SaoPaulo SouthAmerica
	DENV-3	GU131869	2007	Brazil SaoPaulo SouthAmerica
	DENV-3	GU131870	2007	Brazil SaoPaulo SouthAmerica
	DENV-3	GU131871	2007	Brazil SaoPaulo SouthAmerica
	DENV-3	GU131872	2007	Brazil SaoPaulo SouthAmerica
	DENV-3	GU131873	2007	Brazil SaoPaulo SouthAmerica
	DENV-3	GU131874	2007	Brazil SaoPaulo SouthAmerica
	DENV-3	GU131875	2007	Brazil SaoPaulo SouthAmerica
	DENV-3	GU131876	2007	Brazil SaoPaulo SouthAmerica
	DENV-3	GU131877	2007	Brazil SaoPaulo SouthAmerica
	DENV-3	GU131878	2007	Brazil SaoPaulo SouthAmerica
	DENV-3	EF629366	1995	Brazil SouthAmerica
	DENV-3	EF629367	1997	Brazil SouthAmerica
	DENV-3	EF629368	1998	Brazil SouthAmerica
	DENV-3	FJ177308	2001	Brazil SouthAmerica
	DENV-3	FJ898446	2001	Brazil SouthAmerica
	DENV-3	FJ898447	2003	Brazil SouthAmerica
	DENV-3	EF643017	2003	Brazil SouthAmerica
	DENV-3	EF629369	2007	Brazil SouthAmerica
	DENV-3	H666425	2003	GO Brazil SouthAmerica
	DENV-3	H666426	2003	GO Brazil SouthAmerica
	DENV-3	H662476	2002	MA Brazil SouthAmerica
	DENV-3	H704582	2006	MA Brazil SouthAmerica
	DENV-3	FJ898441	2006	Mexico DistritoFederal CentralAmerica
	DENV-3	FJ898440	2003	Mexico Morelos CentralAmerica
	DENV-3	FJ898442	2007	Mexico Puebla CentralAmerica
	DENV-3	H650477	2002	MT Brazil SouthAmerica
	DENV-3	H707629	2006	MT Brazil SouthAmerica
	DENV-3	H707877	2006	MT Brazil SouthAmerica
	DENV-3	JF937652	2009	Nicaragua Boaco CentralAmerica
	DENV-3	FJ882576	1994	Nicaragua CentralAmerica
	DENV-3	GQ199886	1998	Nicaragua CentralAmerica
	DENV-3	JF920401	2010	Nicaragua Chinandega CentralAmerica
	DENV-3	JF920409	2010	Nicaragua Esteli CentralAmerica
	DENV-3	JF920404	2009	Nicaragua Leon CentralAmerica
	DENV-3	JF937641	2009	Nicaragua Leon CentralAmerica
	DENV-3	JF937642	2009	Nicaragua Leon CentralAmerica
	DENV-3	JF920405	2010	Nicaragua Leon CentralAmerica
	DENV-3	JF920406	2010	Nicaragua Leon CentralAmerica
	DENV-3	FJ850048	2008	Nicaragua Managua CentralAmerica
	DENV-3	FJ850049	2008	Nicaragua Managua CentralAmerica
	DENV-3	FJ850052	2008	Nicaragua Managua CentralAmerica
	DENV-3	FJ873812	2008	Nicaragua Managua CentralAmerica
	DENV-3	FJ873813	2008	Nicaragua Managua CentralAmerica
	DENV-3	FJ898475	2008	Nicaragua Managua CentralAmerica
	DENV-3	GQ199871	2008	Nicaragua Managua CentralAmerica
	DENV-3	HQ541790	2008	Nicaragua Managua CentralAmerica
	DENV-3	HQ541791	2008	Nicaragua Managua CentralAmerica
	DENV-3	GQ199865	2009	Nicaragua Managua CentralAmerica
	DENV-3	HM181972	2009	Nicaragua Managua CentralAmerica
	DENV-3	HM181973	2009	Nicaragua Managua CentralAmerica
	DENV-3	HM181974	2009	Nicaragua Managua CentralAmerica
	DENV-3	HM181975	2009	Nicaragua Managua CentralAmerica
	DENV-3	HM181976	2009	Nicaragua Managua CentralAmerica
	DENV-3	HM181977	2009	Nicaragua Managua CentralAmerica
	DENV-3	HM631860	2009	Nicaragua Managua CentralAmerica
	DENV-3	HM631862	2009	Nicaragua Managua CentralAmerica
	DENV-3	HM631863	2009	Nicaragua Managua CentralAmerica
	DENV-3	HM631869	2009	Nicaragua Managua CentralAmerica
	DENV-3	HM756274	2009	Nicaragua Managua CentralAmerica
	DENV-3	HM756275	2009	Nicaragua Managua CentralAmerica
	DENV-3	HM756276	2009	Nicaragua Managua CentralAmerica
	DENV-3	HM756277	2009	Nicaragua Managua CentralAmerica
	DENV-3	HM756278	2009	Nicaragua Managua CentralAmerica
	DENV-3	HM756281	2009	Nicaragua Managua CentralAmerica
	DENV-3	HQ166031	2009	Nicaragua Managua CentralAmerica
	DENV-3	HQ166032	2009	Nicaragua Managua CentralAmerica
	DENV-3	HQ166033	2009	Nicaragua Managua CentralAmerica
	DENV-3	HQ671176	2009	Nicaragua Managua CentralAmerica
	DENV-3	HQ671177	2009	Nicaragua Managua CentralAmerica
	DENV-3	HQ705609	2009	Nicaragua Managua CentralAmerica
	DENV-3	HQ705610	2009	Nicaragua Managua CentralAmerica
	DENV-3	HQ705611	2009	Nicaragua Managua CentralAmerica
	DENV-3	HQ705612	2009	Nicaragua Managua CentralAmerica
	DENV-3	HQ705613	2009	Nicaragua Managua CentralAmerica
	DENV-3	HQ705614	2009	Nicaragua Managua CentralAmerica
	DENV-3	HQ705615	2009	Nicaragua Managua CentralAmerica
	DENV-3	HQ705616	2009	Nicaragua Managua CentralAmerica
	DENV-3	HQ705617	2009	Nicaragua Managua CentralAmerica
	DENV-3	JF920394	2009	Nicaragua Managua CentralAmerica
	DENV-3	JF920395	2009	Nicaragua Managua CentralAmerica
	DENV-3	JF920396	2009	Nicaragua Managua CentralAmerica
	DENV-3	JF920399	2009	Nicaragua Managua CentralAmerica
	DENV-3	JF920400	2009	Nicaragua Managua CentralAmerica
	DENV-3	JF937630	2009	Nicaragua Managua CentralAmerica
	DENV-3	JF937631	2009	Nicaragua Managua CentralAmerica
	DENV-3	JF937636	2009	Nicaragua Managua CentralAmerica
	DENV-3	JF937647	2009	Nicaragua Managua CentralAmerica
	DENV-3	JN000936	2009	Nicaragua Managua CentralAmerica
	DENV-3	JN093514	2009	Nicaragua Managua CentralAmerica
	DENV-3	JN093517	2009	Nicaragua Managua CentralAmerica
	DENV-3	JN183884	2009	Nicaragua Managua CentralAmerica
	DENV-3	JF937625	2010	Nicaragua Managua CentralAmerica
	DENV-3	JF937626	2010	Nicaragua Managua CentralAmerica
	DENV-3	JF937627	2010	Nicaragua Managua CentralAmerica
	DENV-3	JF937628	2010	Nicaragua Managua CentralAmerica
	DENV-3	JF937629	2010	Nicaragua Managua CentralAmerica
	DENV-3	JF937633	2010	Nicaragua Managua CentralAmerica
	DENV-3	JF937634	2010	Nicaragua Managua CentralAmerica
	DENV-3	JF937638	2010	Nicaragua Managua CentralAmerica
	DENV-3	JF937639	2010	Nicaragua Managua CentralAmerica
	DENV-3	JF937640	2010	Nicaragua Managua CentralAmerica
	DENV-3	JF937646	2010	Nicaragua Managua CentralAmerica
	DENV-3	JF937648	2010	Nicaragua Managua CentralAmerica
	DENV-3	JN000937	2010	Nicaragua Managua CentralAmerica
	DENV-3	JN000938	2010	Nicaragua Managua CentralAmerica
	DENV-3	JN093513	2010	Nicaragua Managua CentralAmerica
	DENV-3	JN093515	2010	Nicaragua Managua CentralAmerica
	DENV-3	JF920408	2010	Nicaragua NuevaSegovia CentralAmerica
	DENV-3	JF920407	2009	Nicaragua RAAS CentralAmerica
	DENV-3	JF920402	2009	Nicaragua RioSanJuan CentralAmerica
	DENV-3	JF920403	2009	Nicaragua RioSanJuan CentralAmerica
	DENV-3	EU482558	1998	PuertoRico Caribbean
	DENV-3	EU482559	1998	PuertoRico Caribbean
	DENV-3	EU482563	1998	PuertoRico Caribbean
	DENV-3	EU482566	1998	PuertoRico Caribbean
	DENV-3	EU482596	1998	PuertoRico Caribbean
	DENV-3	EU529703	1998	PuertoRico Caribbean
	DENV-3	EU687218	1998	PuertoRico Caribbean
	DENV-3	EU726771	1998	PuertoRico Caribbean
	DENV-3	EU726772	1998	PuertoRico Caribbean
	DENV-3	FJ182013	1998	PuertoRico Caribbean
	DENV-3	FJ547070	1998	PuertoRico Caribbean
	DENV-3	EU529696	1999	PuertoRico Caribbean
	DENV-3	EU687219	1999	PuertoRico Caribbean
	DENV-3	EU687226	1999	PuertoRico Caribbean
	DENV-3	EU726773	1999	PuertoRico Caribbean
	DENV-3	EU726774	1999	PuertoRico Caribbean
	DENV-3	EU781136	1999	PuertoRico Caribbean
	DENV-3	EU781137	1999	PuertoRico Caribbean
	DENV-3	FJ205871	1999	PuertoRico Caribbean
	DENV-3	FJ390375	1999	PuertoRico Caribbean
	DENV-3	FJ390376	1999	PuertoRico Caribbean
	DENV-3	FJ390377	1999	PuertoRico Caribbean
	DENV-3	FJ547069	1999	PuertoRico Caribbean
	DENV-3	EU529697	2000	PuertoRico Caribbean
	DENV-3	EU687221	2000	PuertoRico Caribbean
	DENV-3	EU726768	2000	PuertoRico Caribbean
	DENV-3	FJ410176	2000	PuertoRico Caribbean
	DENV-3	FJ410177	2000	PuertoRico Caribbean
	DENV-3	FJ547071	2000	PuertoRico Caribbean
	DENV-3	FJ547072	2000	PuertoRico Caribbean
	DENV-3	FJ547073	2000	PuertoRico Caribbean
	DENV-3	FJ547074	2000	PuertoRico Caribbean
	DENV-3	FJ547075	2000	PuertoRico Caribbean
	DENV-3	FJ547076	2000	PuertoRico Caribbean
	DENV-3	FJ547077	2000	PuertoRico Caribbean
	DENV-3	FJ547078	2000	PuertoRico Caribbean
	DENV-3	FJ562107	2000	PuertoRico Caribbean
	DENV-3	FJ547079	2001	PuertoRico Caribbean
	DENV-3	FJ547081	2001	PuertoRico Caribbean
	DENV-3	FJ547082	2001	PuertoRico Caribbean
	DENV-3	EU687196	2002	PuertoRico Caribbean
	DENV-3	EU687234	2002	PuertoRico Caribbean
	DENV-3	EU854298	2002	PuertoRico Caribbean
	DENV-3	FJ390373	2002	PuertoRico Caribbean
	DENV-3	FJ410178	2002	PuertoRico Caribbean
	DENV-3	FJ478456	2002	PuertoRico Caribbean
	DENV-3	FJ547083	2002	PuertoRico Caribbean
	DENV-3	FJ547084	2002	PuertoRico Caribbean
	DENV-3	EU482564	2003	PuertoRico Caribbean
	DENV-3	EU482595	2003	PuertoRico Caribbean
	DENV-3	EU529702	2003	PuertoRico Caribbean
	DENV-3	EU687198	2003	PuertoRico Caribbean
	DENV-3	EU687239	2003	PuertoRico Caribbean
	DENV-3	EU726769	2003	PuertoRico Caribbean
	DENV-3	FJ205870	2003	PuertoRico Caribbean
	DENV-3	FJ390372	2003	PuertoRico Caribbean
	DENV-3	EU529704	2004	PuertoRico Caribbean
	DENV-3	EU529705	2004	PuertoRico Caribbean
	DENV-3	FJ024465	2004	PuertoRico Caribbean
	DENV-3	FJ024467	2004	PuertoRico Caribbean
	DENV-3	FJ024468	2004	PuertoRico Caribbean
	DENV-3	FJ024469	2004	PuertoRico Caribbean
	DENV-3	FJ024471	2004	PuertoRico Caribbean
	DENV-3	FJ182004	2004	PuertoRico Caribbean
	DENV-3	FJ182005	2004	PuertoRico Caribbean
	DENV-3	FJ182006	2004	PuertoRico Caribbean
	DENV-3	FJ373302	2004	PuertoRico Caribbean
	DENV-3	FJ850056	2004	PuertoRico Caribbean
	DENV-3	FJ182009	2005	PuertoRico Caribbean
	DENV-3	FJ182010	2005	PuertoRico Caribbean
	DENV-3	FJ182011	2005	PuertoRico Caribbean
	DENV-3	FJ182037	2005	PuertoRico Caribbean
	DENV-3	FJ182038	2005	PuertoRico Caribbean
	DENV-3	FJ182039	2005	PuertoRico Caribbean
	DENV-3	FJ182040	2005	PuertoRico Caribbean
	DENV-3	EU482555	2006	PuertoRico Caribbean
	DENV-3	EU529692	2006	PuertoRico Caribbean
	DENV-3	EU529698	2006	PuertoRico Caribbean
	DENV-3	EU529699	2006	PuertoRico Caribbean
	DENV-3	FJ547085	2006	PuertoRico Caribbean
	DENV-3	EU596492	2007	PuertoRico Caribbean
	DENV-3	EU596493	2007	PuertoRico Caribbean
	DENV-3	EU596494	2007	PuertoRico Caribbean
	DENV-3	H665993	2003	RN Brazil SouthAmerica
	DENV-3	H712120	2006	RN Brazil SouthAmerica
	DENV-3	H734020	2007	RN Brazil SouthAmerica
	DENV-3	H660007	2002	RR Brazil SouthAmerica
	DENV-3	H685606	2004	RR Brazil SouthAmerica
	DENV-3	H692798	2005	RR Brazil SouthAmerica
	DENV-3	H692808	2005	RR Brazil SouthAmerica
	DENV-3	H696735	2005	RR Brazil SouthAmerica
	DENV-3	H734230	2007	RR Brazil SouthAmerica
	DENV-3	H741615	2008	RR Brazil SouthAmerica
	DENV-3	FJ898463	2001	SaintLucia Caribbean
	DENV-3	GQ868616	2001	SaintLucia Caribbean
	DENV-3	FJ882571	1989	SriLanka Southasia
	DENV-3	FJ882572	1989	SriLanka Southasia
	DENV-3	JQ411814	1989	SriLanka Southasia
	DENV-3	DQ863638	1973	Thailand Bangkok SoutheastAsia
	DENV-3	FJ687448	2001	Thailand KampheangePhet SoutheastAsia
	DENV-3	GQ868593	1973	Thailand SoutheastAsia
	DENV-3	AY876494	1994	Thailand SoutheastAsia
	DENV-3	AY923865	1994	Thailand SoutheastAsia
	DENV-3	H705063	2006	TO Brazil SouthAmerica
	DENV-3	H724440	2007	TO Brazil SouthAmerica
	DENV-3	H744441	2007	TO Brazil SouthAmerica
	DENV-3	FJ898459	2002	TrinidadandTobago Caribbean
	DENV-3	GQ868617	2002	TrinidadandTobago Caribbean
	DENV-3	FJ639746	2000	Venezuela Aragua SouthAmerica
	DENV-3	FJ639747	2000	Venezuela Aragua SouthAmerica
	DENV-3	FJ639749	2000	Venezuela Aragua SouthAmerica
	DENV-3	FJ639750	2000	Venezuela Aragua SouthAmerica
	DENV-3	FJ898468	2000	Venezuela Aragua SouthAmerica
	DENV-3	FJ639751	2001	Venezuela Aragua SouthAmerica
	DENV-3	FJ639752	2001	Venezuela Aragua SouthAmerica
	DENV-3	FJ639753	2001	Venezuela Aragua SouthAmerica
	DENV-3	FJ639754	2001	Venezuela Aragua SouthAmerica
	DENV-3	FJ639755	2001	Venezuela Aragua SouthAmerica
	DENV-3	FJ639756	2001	Venezuela Aragua SouthAmerica
	DENV-3	FJ639757	2001	Venezuela Aragua SouthAmerica
	DENV-3	FJ639758	2001	Venezuela Aragua SouthAmerica
	DENV-3	FJ639759	2001	Venezuela Aragua SouthAmerica
	DENV-3	FJ639760	2001	Venezuela Aragua SouthAmerica
	DENV-3	FJ639761	2001	Venezuela Aragua SouthAmerica
	DENV-3	FJ639762	2001	Venezuela Aragua SouthAmerica
	DENV-3	FJ639763	2001	Venezuela Aragua SouthAmerica
	DENV-3	FJ639765	2001	Venezuela Aragua SouthAmerica
	DENV-3	FJ639766	2001	Venezuela Aragua SouthAmerica
	DENV-3	FJ639767	2001	Venezuela Aragua SouthAmerica
	DENV-3	FJ639768	2001	Venezuela Aragua SouthAmerica
	DENV-3	FJ639769	2001	Venezuela Aragua SouthAmerica
	DENV-3	FJ639770	2001	Venezuela Aragua SouthAmerica
	DENV-3	FJ639781	2003	Venezuela Aragua SouthAmerica
	DENV-3	FJ639782	2003	Venezuela Aragua SouthAmerica
	DENV-3	FJ639784	2003	Venezuela Aragua SouthAmerica
	DENV-3	FJ639785	2003	Venezuela Aragua SouthAmerica
	DENV-3	FJ639786	2003	Venezuela Aragua SouthAmerica
	DENV-3	FJ898472	2003	Venezuela Aragua SouthAmerica
	DENV-3	FJ898473	2003	Venezuela Aragua SouthAmerica
	DENV-3	FJ639787	2004	Venezuela Aragua SouthAmerica
	DENV-3	FJ639789	2004	Venezuela Aragua SouthAmerica
	DENV-3	FJ639790	2004	Venezuela Aragua SouthAmerica
	DENV-3	FJ639791	2004	Venezuela Aragua SouthAmerica
	DENV-3	FJ639792	2004	Venezuela Aragua SouthAmerica
	DENV-3	FJ639793	2004	Venezuela Aragua SouthAmerica
	DENV-3	FJ639795	2004	Venezuela Aragua SouthAmerica
	DENV-3	FJ639798	2004	Venezuela Aragua SouthAmerica
	DENV-3	FJ639799	2004	Venezuela Aragua SouthAmerica
	DENV-3	FJ639800	2004	Venezuela Aragua SouthAmerica
	DENV-3	FJ639801	2004	Venezuela Aragua SouthAmerica
	DENV-3	FJ639803	2005	Venezuela Aragua SouthAmerica
	DENV-3	FJ639804	2005	Venezuela Aragua SouthAmerica
	DENV-3	FJ639805	2005	Venezuela Aragua SouthAmerica
	DENV-3	FJ639807	2005	Venezuela Aragua SouthAmerica
	DENV-3	FJ639810	2005	Venezuela Aragua SouthAmerica
	DENV-3	FJ639816	2005	Venezuela Aragua SouthAmerica
	DENV-3	FJ639817	2006	Venezuela Aragua SouthAmerica
	DENV-3	FJ639825	2006	Venezuela Aragua SouthAmerica
	DENV-3	EU529683	2007	Venezuela Aragua SouthAmerica
	DENV-3	EU932687	2007	Venezuela Aragua SouthAmerica
	DENV-3	EU932688	2007	Venezuela Aragua SouthAmerica
	DENV-3	FJ639772	2007	Venezuela Aragua SouthAmerica
	DENV-3	FJ850109	2007	Venezuela Aragua SouthAmerica
	DENV-3	FJ850110	2007	Venezuela Aragua SouthAmerica
	DENV-3	FJ850111	2007	Venezuela Aragua SouthAmerica
	DENV-3	FJ898474	2007	Venezuela Aragua SouthAmerica
	DENV-3	GQ868586	2007	Venezuela Aragua SouthAmerica
	DENV-3	GQ868587	2007	Venezuela Aragua SouthAmerica
	DENV-3	FJ639826	2008	Venezuela Aragua SouthAmerica
	DENV-3	FJ639827	2008	Venezuela Aragua SouthAmerica
	DENV-3	FJ373303	2001	Venezuela DRF Caracas SouthAmerica
	DENV-3	EU482612	2001	Venezuela DRF Caracas SouthAmerica
	DENV-3	EU482613	2001	Venezuela DRF Caracas SouthAmerica
	DENV-3	EU482614	2001	Venezuela DRF Caracas SouthAmerica
	DENV-3	EU529684	2001	Venezuela DRF Caracas SouthAmerica
	DENV-3	EU529685	2001	Venezuela DRF Caracas SouthAmerica
	DENV-3	EU529686	2001	Venezuela DRF Caracas SouthAmerica
	DENV-3	EU529687	2001	Venezuela DRF Caracas SouthAmerica
	DENV-3	EU529688	2001	Venezuela DRF Caracas SouthAmerica
	DENV-3	EU529689	2001	Venezuela DRF Caracas SouthAmerica
	DENV-3	EU529690	2001	Venezuela DRF Caracas SouthAmerica
	DENV-3	EU529691	2001	Venezuela DRF Caracas SouthAmerica
	DENV-3	EU569688	2001	Venezuela DRF Caracas SouthAmerica
	DENV-3	EU569689	2001	Venezuela DRF Caracas SouthAmerica
	DENV-3	EU569690	2001	Venezuela DRF Caracas SouthAmerica
	DENV-3	EU569691	2001	Venezuela DRF Caracas SouthAmerica
	DENV-3	EU660420	2001	Venezuela DRF Caracas SouthAmerica
	DENV-3	FJ182015	2001	Venezuela DRF Caracas SouthAmerica
	DENV-3	EU854291	2004	Venezuela DRF Caracas SouthAmerica
	DENV-3	FJ373304	2004	Venezuela DRF Caracas SouthAmerica
	DENV-3	EU854292	2005	Venezuela DRF Caracas SouthAmerica
