# Supplementary material for: Air Travel Is Associated with Intracontinental Spread of Dengue Virus Serotypes 1–3 in Brazil
Source: PLoS Negl Trop Dis. 2014 Apr 17;8(4):e2769. doi: 10.1371/journal.pntd.0002769 (PMC3990485; doi:10.1371/journal.pntd.0002769)
Supplement: Table S3 — Number of DENV complete sequences used for phylogenetic and phylogeographic analyzes according to the geographic location, continent or region, and DENV serotype. (XLSX) [file pntd.0002769.s004.xlsx]

## Sheet: Table 1 and 2
Table 1. Mean ages of the MRCA of Brazilian clades, most probable origins, substitution rates and dispersal rates
Serotype	MRCA (BCI)	Root state location (PP)	Rates (10-4 s/s/y) (BCI)	Dispersal rate (km/y) (BCI)
DENV-1
Brazilian clade 1 (n=24)	1995 (1991, 1997)	Caribbean (0.88)	3.26 (2.57, 4.07)	134.83 (85.86, 189.74)
Brazilian clade 2 (n=14)	1985 (1981, 1989)	Caribbean (0.92)	6.97 (5.84, 8.12)	241.91 (193.81, 295.41)
Brazilian clade 3 (n=5)	2006 (2005, 2007)	Venezuela (1.00)	6.41 (2.72, 12.15)	NA
DENV-2
Brazilian clade 1 (n=17)	1990 (1989, 1991)	Caribbean (0.84)	10.03 (8.09, 12.02)	189.07 (125.38, 248.36)
Brazilian clade 2 (n=16)	1998 (1997, 1999)	Caribbean (0.98)	13.99 (11.07, 17.04)	142.54 (85.71, 21.58)
Brazilian clade 3 (n=21)	2004.5 (2004, 2005)	Caribbean (1.00)	14.11 (8.99, 2.04)	429.81 (258.59, 614.81)
DENV-3
Brazilian clade 1 (n=7)	1998 (1995, 2001)	Caribbean (0.98)	2.62 (2.11, 3.23)	NA
Brazilian clade 2 (n=75)	1990 (1988, 1992)	Caribbean (0.97)	3.01 (2.56, 3.48)	99.86 (75.58, 125.07)
Notes: BCI: Bayesian credible interval; PP: Posterior Probability; s/s/y: substitution per site per year
Dispersal rates estimated according to the best-fit continuous diffusion model (DENV-1: RRW gamma, DENV-2: RRW Cauchy, DENV-3: RRW: Gamma)
Table 2. Most significant links of viral dispersal and number of jumps among geographic regions
From	To	Bayes factor	DENV-1	DENV-2	DENV-3
North	Northeast	16.93	4	3	3
Central-West	Southeast	9.41	-	-	2
Southeast	Central-West	5.08	-	-	1
Northeast	North	3.76	-	-	1
Northeast	Central-West	3.46	2	-	1
South	North	3.3	-	-	1
Southeast	North	3.11	-	-	1

## Sheet: Table S1
Supplementary Table 1 – List of RACE primers used for recovering 5’ and 3’ UTR regions of DENV serotypes
DENV serotypes	Termial region	RACE Primers	Sequence (5'->3')	TM (o.C)
DENV-1	5' UTR	DENV-1 SP1		60
		DENV-1 SP2		60
		DENV-1 SP3		60
	3'UTR	DENV-1 SP1		55
		DENV-1 SP2		55
DENV-2	5' UTR	DENV-1 SP1		60
		DENV-1 SP2		60
		DENV-1 SP3		60
	3'UTR	DENV-1 SP1		55
		DENV-1 SP2		55
DENV-3	5' UTR	DENV-1 SP1		60
		DENV-1 SP2		60
		DENV-1 SP3		60
	3'UTR	DENV-1 SP1		55
		DENV-1 SP2		55

## Sheet: Table S2
Table S2 – DENV strains used for phylogeographic and spatial-temporal analyses according to its serotype, strain, source of isolation and geographic location (Federal states or Cities*) in Brazil.
Serotype	Strain	Source of isolation	Federal state	Year of Isolation	Serotype	Strain	Source of isolation	Federal state	Year of isolation
DENV-1	H527543	human	Ceará		DENV-2	H 652413	human	Espírito Santo
	H547625	human	Pará			H 654413	human	Mato Grosso do Sul
	H550175	human	Minas Gerais			H 645487	human	Maranhão
	H551022	human	Pará			H 642152	human	Ceará
	H611377	human	Maranhão			H 626903	human	Roraima
	H622822	human	Mato Grosso			H 629766	human	Acre
	H631185	human	Ceará			H 617724	human	Rio Grande do Norte
	H631188	human	Ceará			H 618438	human	Pará
	H628435	human	Acre			H 623360	human	Pará
	H648234	human	Amapá			H628243	human	Pará
	H693852	human	Rio Grande do Norte			H 527541	human	Ceará
	H650290	human	Roraima			H 527821	human	Ceará
	H655243	human	Piauí			H 517822	human	Ceará
	H660409	human	Amazonas			H 533198	human	Minas Gerais
	H660415	human	Amazonas			H 547176	human	Roraima
	H655251	human	Piauí			H 547177	human	Roraima
	H650975	human	Mato Grosso			H 508744	human	Tocantins
	H656274	human	Tocantins			H 506347	human	Rio Grande do Norte
	H672029	human	Maranhão		DENV-3	H 666426	human	Goiás
	H685572	human	Pará			H 650477	human	Mato Grosso
	H695190	human	Amapá			H 665993	human	Rio Grande do Norte
	H716995	human	Pará			H 666425	human	Goiás
	H739688	human	Amazonas			H 660007	human	Roraima
	H733587	human	Roraima			H 662476	human	Maranhão
	H721251	human	Pará			H 659202	human	Belém*
	AR 721365	Aedes aegypti	Pará			H 685606	human	Roraima
	AR 721368	Aedes aegypti	Pará			H 675971	human	Amazonas
	H748499	human	Roraima			H 675948	human	Belem
	H 716995	human	Pará			H 687202	human	Belem
	H 650290	human	Roraima			H 696789	human	Acre
	H 693857	human	Rio Grande do Norte			H 696735	human	Roraima
	H 672029	human	Maranhão			H 692798	human	Roraima
	H741571	human	Mato Grosso do Sul			H 692808	human	Roraima
	H745526	human	Espirito Santo			H 692262	human	Belem*
DENV-2	H 745039	human	Rio Grande do Norte			H 702980	human	Amazonas
	H 739202	human	Tocantins			H 704582	human	Maranhão
	H 726377	human	Amapá			H 707629	human	Mato Grosso
	H 723494	human	Maranhão			H 712120	human	Rio Grande do Norte
	H 723495	human	Maranhão			H 707877	human	Mato Grosso
	H 730923	human	Amazonas			H 706777	human	Belem*
	H 710008	human	Amapá			H 705063	human	Tocantins
	H 710686	human	Rondônia			H 721198	human	Belem*
	H 709119	human	Tocantins			H 734020	human	Rio Grande do Norte
	H 688004	human	Pará			H 734230	human	Roraima
	H 674704	human	Pará			H 724440	human	Tocantins
	H 676618	human	Acre			H 735102	human	Acre
	H 666995	human	Pará			H 724441	human	Tocantins
	H 660059	human	Amapá			H 741675	human	Roraima
	H 655259	human	Piauí			H 740416	human	Amazonas
					* City of Belém, captal of Pará State, Northern Brazil.

## Sheet: Sup Table 3
Supplementary table 3 - Number of DENV complete sequences used for phylogenetic and phylogeographic
analyzes according to the geographiv location, continent or region, and DENV serotype
Geographic location		No. of sequences
	Continent/region	DENV-1	DENV-2	DENV-3	DENV- 1 DENV-2 DENV-3/country	DENV- 1 DENV-2 DENV-3/continent
Reunion	African	1	0	0	1
Brunei		1	0	0	1
Malaysia		1	0	0	1
Singapore		1	1	0	2
Thailand	Asian	2	6	5	13
Cambodia		0	6	0	6
VietNam		0	8	0	8
Bangladesh		0	0	4	4
SriLanka		0	0	3	3	39
Mexico	North America	70	11	3	84
USA		32	0	0	32	116
ElSalvador	Central America	1	0	0	1
Nicaragua		44	80	83	207	208
British VirginIslands		1	0	0	1
Dominican Republic		0	1	0	1
Jamaica		0	1	0	1
Puerto Rico	Caribean region	0	80	83	163
Virgin Islands		0	3	0	3
Anguilla Caribbean		0	0	1	1
Saint Lucia		0	0	2	2
Trinidad and Tobago		0	0	2	2	174
Argentina		7	0	0	7
Brazil		42	54	83	179
Colombia	South America	14	14	0	28
French Guyana		2	0	0	2
Paraguay		2	0	0	2
Venezuela		67	29	83	179	397
Total		288	294	352		934
