# Supplementary material for: Air Travel Is Associated with Intracontinental Spread of Dengue Virus Serotypes 1–3 in Brazil
Source: PLoS Negl Trop Dis. 2014 Apr 17;8(4):e2769. doi: 10.1371/journal.pntd.0002769 (PMC3990485; doi:10.1371/journal.pntd.0002769)
Supplement: Table S4 — Model selection of the continuous phylogeographic model for DENV-1 dataset (a), DENV-2 dataset (b), and DENV-3 dataset (c). (XLSX) [file pntd.0002769.s005.xlsx]

## Sheet: Plan1
Supplementary Table 4: Model selection of the continuous phylogeographic model
for DENV-1 dataset (a), DENV-2 dataset (b), and DENV-3 dataset (c)
(a)
	Homogeneous	Cauchy	Gamma	Lognormal
HME	-35304.1	-35266.1	-35258.6	-35270.8
sHME	-35290.8	-35254.6	-35247.3	-35258
AICM	70679.1	70626.3	70610.7	70640.1
PS	-35497.1	-35474	-35470.3	-35480.7
SS	-35497.3	-35474.7	-35471.2	-35480.8
(b)
	Homogeneous	Cauchy	Gamma	Lognormal
HME	-54896.4	-54800.1	-54793.9	-54809.6
sHME	-54882.3	-54781.6	-54777.3	-54791.2
AICM	109962	109754	109741	109780
PS	-55187.3	-55093.5	-55097.8	-55117.6
SS	-55188.1	-55093.5	-55100	-55119
(c)
	Homogeneous	Cauchy	Gamma	Lognormal
HME	-36516.4	-36424.2	-36395.7	-36554.5
sHME	-36502.4	-36376.5	-36379.9	-36527
AICM	73240.4	73398.8	73407.6	77435.8
PS	-36990.7	-36879.9	-36842.1	-36883.8
SS	-36995.5	-36884.1	-36848.6	-36888.1
Bolded numbers represents the best selected parameters
